# Supplementary material
Source: PubMed Central journal article supplement (PMC11073234)

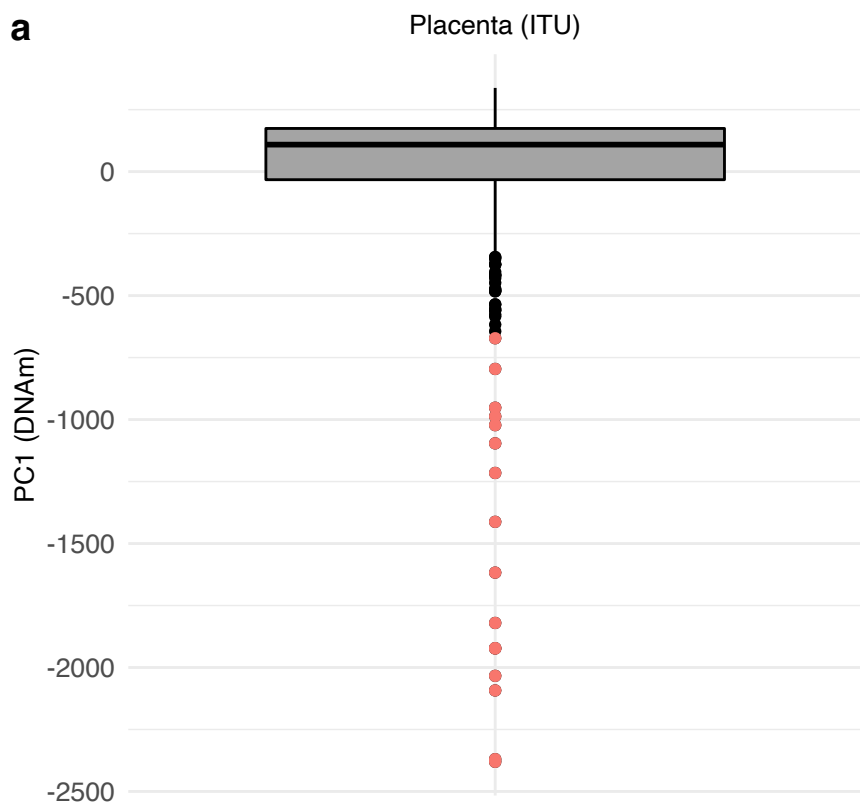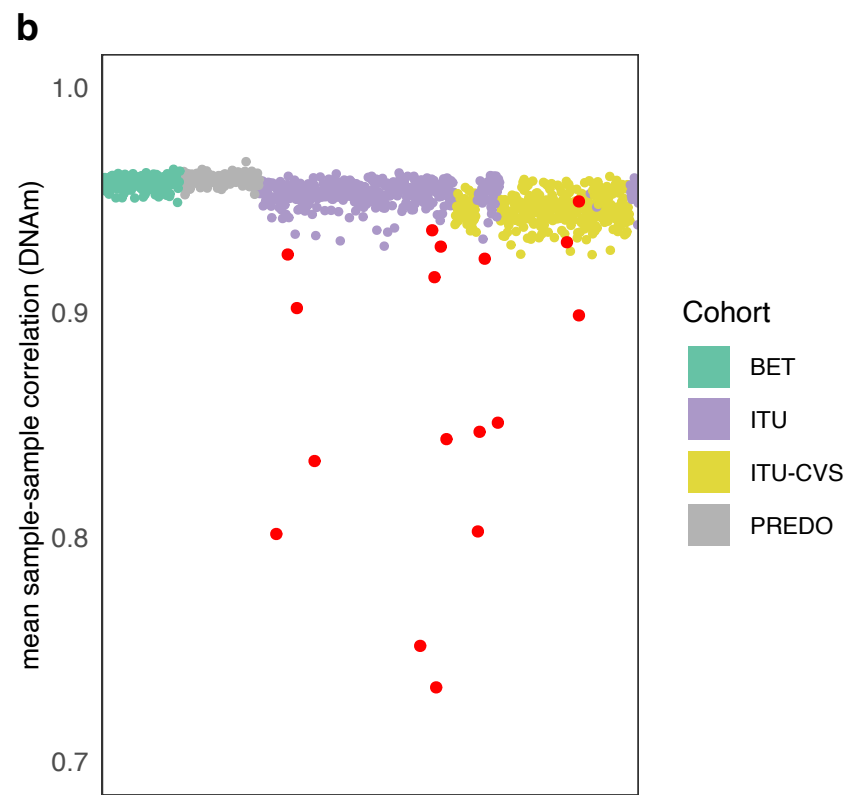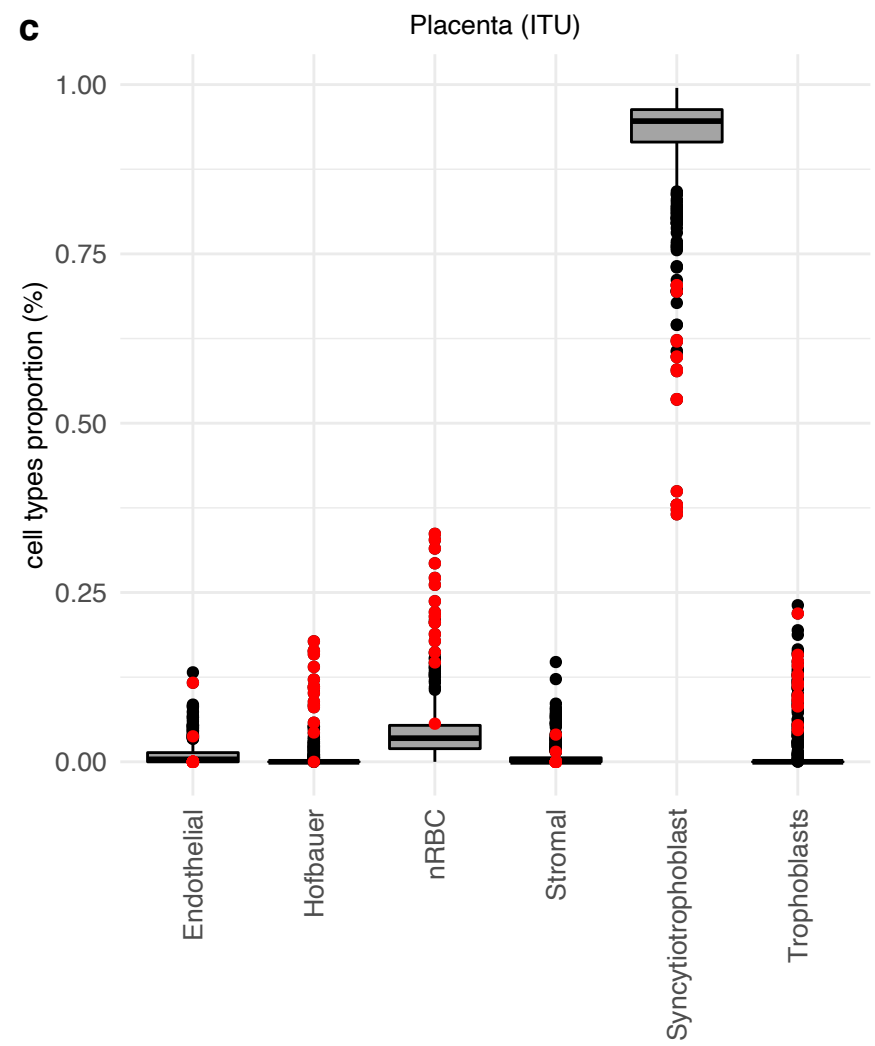

Supplement: 18_2021_4091_MOESM2_ESM.pdf [file 18_2021_4091_MOESM2_ESM.pdf]
